# Supplementary material for: Association between Daily Pattern of Physical Activity and Depression: A Systematic Review
Source: Int J Environ Res Public Health. 2022 May 26;19(11):6505. doi: 10.3390/ijerph19116505 (PMC9180107; doi:10.3390/ijerph19116505)
Supplement: Supplementary file 1 [file ijerph-19-06505-s001.zip › ijerph-1683109-supplementary.pdf]

**Supplementary Table S1.** Search strategy in PubMed/MEDLINE and Scopus.

| SET | PubMed/MEDLINE                         |
|-----|----------------------------------------|
| 1   | "Patient Health Questionnaire"[Mesh]   |
| 2   | "Depressive Disorder"[Mesh]            |
| 3   | "Depression"[Mesh]                     |
| 4   | depression[Title/Abstract]             |
| 5   | depressive[Title/Abstract]             |
| 6   | PHQ[Title/Abstract]                    |
| 7   | Sets 1-6 were combined with "OR"       |
| 8   | "Screen Time"[Mesh]                    |
| 9   | "Exercise"[Mesh]                       |
| 10  | "Sports"[Mesh]                         |
| 11  | "Leisure Activities"[Mesh]             |
| 12  | "Sitting Position"[Mesh]               |
| 13  | "Supine Position"[Mesh]                |
| 14  | "Sedentary Behavior"[Mesh]             |
| 15  | "sedentary time" [Title/Abstract]      |
| 16  | "sedentary pattern" [Title/Abstract]   |
| 17  | "sedentary behaviour" [Title/Abstract] |
| 18  | "sedentary behavior" [Title/Abstract]  |
| 19  | "Walking"[Mesh]                        |
| 20  | "Walking Speed"[Mesh]                  |
| 21  | "Bicycling"[Mesh]                      |
| 22  | "Endurance Training"[Mesh]             |
| 23  | "Movement"[Mesh]                       |
| 24  | Movement*[Title/Abstract]              |
| 25  | sport*[Title/Abstract]                 |
| 26  | physical activity[Title/Abstract]      |
| 27  | physical activities[Title/Abstract]    |
| 28  | physical exercise[Title/Abstract]      |
| 29  | physical exercises[Title/Abstract]     |
| 30  | walking[Title/Abstract]                |
| 31  | stepping[Title/Abstract]               |
| 32  | sitting[Title/Abstract]                |
| 33  | Sets 8-32 were combined with "OR"      |
| 34  | Set 7-33 were combined with "AND"      |
| 35  | "Actigraphy"[Mesh]                     |
| 36  | "Accelerometry"[Mesh]                  |
| 37  | pedometer*[Title/Abstract]             |
| 38  | ActivPAL [Title/Abstract]              |
| 39  | 24 hours [Title/Abstract]              |
| 40  | 24 hour [Title/Abstract]               |
| 41  | 24-hour [Title/Abstract]               |
| 42  | 24-hours[Title/Abstract]               |
| 43  | "Diurnal patterns" [Title/Abstract]    |
| 44  | "Diurnal pattern" [Title/Abstract]     |
| 45  | Diurnal [Title/Abstract]               |
| 46  | Hourly pattern [Title/Abstract]        |
| 47  | Hourly patterns [Title/Abstract]       |
| 48  | "Daily pattern" [Title/Abstract]       |

|    |                                         |
|----|-----------------------------------------|
| 49 | "Daily patterns"[Title/Abstract]        |
| 50 | Chronotype [Title/Abstract]             |
| 51 | Morningness [Title/Abstract]            |
| 52 | Eveningness [Title/Abstract]            |
| 53 | "Circadian Clocks"[Mesh]                |
| 54 | "Circadian Rhythm"[Mesh]                |
| 55 | Set 35-54 were combined with "OR"       |
| 56 | Set 33-55 were combined with "AND"      |
| 57 | "Review" [Publication Type]             |
| 58 | "Review Literature as Topic"[Mesh]      |
| 59 | review[Title/Abstract]                  |
| 60 | "Meta-Analysis" [Publication Type]      |
| 61 | "Meta-Analysis as Topic"[Mesh]          |
| 62 | "Network Meta-Analysis"[Mesh]           |
| 63 | "Infant, Newborn"[Mesh]                 |
| 64 | "Infant"[Mesh]                          |
| 65 | "Child"[Mesh]                           |
| 66 | child[Title/Abstract]                   |
| 67 | children[Title/Abstract]                |
| 68 | infant*[Title/Abstract]))               |
| 69 | "Depression, Postpartum"[Mesh]          |
| 70 | Sets 57-69 were combined with "OR"      |
| 71 | Sets 7 and 56 were combined with "AND"  |
| 72 | Sets 71 and 70 were combined with "NOT" |
| 73 | Set 72 was limited to English language  |

| SET | Scopus                                |
|-----|---------------------------------------|
| 1   | "Screen Time"[TITLE-ABS-KEY]          |
| 2   | "Exercise"[TITLE-ABS-KEY]             |
| 3   | Sport*[TITLE-ABS-KEY]                 |
| 4   | "Leisure activities"[TITLE-ABS-KEY]   |
| 5   | "Sitting position"[TITLE-ABS-KEY]     |
| 6   | "Supine position"[TITLE-ABS-KEY]      |
| 7   | "Sedentary behaviour" [TITLE-ABS-KEY] |
| 8   | "Sedentary time" [TITLE-ABS-KEY]      |
| 9   | "Sedentary pattern" [TITLE-ABS-KEY]   |
| 10  | "Walking" [TITLE-ABS-KEY]             |
| 11  | "Walking speed" [TITLE-ABS-KEY]       |
| 12  | "Bicycling" [TITLE-ABS-KEY]           |
| 13  | "Endurance training" [TITLE-ABS-KEY]  |
| 14  | Movement*[TITLE-ABS-KEY]              |
| 15  | "Physical activity" [TITLE-ABS-KEY]   |
| 16  | "Physical activities" [TITLE-ABS-KEY] |
| 17  | "Physical exercise" [TITLE-ABS-KEY]   |
| 18  | "Physical exercises" [TITLE-ABS-KEY]  |
| 19  | "Stepping" [TITLE-ABS-KEY]            |
| 20  | "Sitting" [TITLE-ABS-KEY]             |
| 21  | Sets 1-20 were combined with "OR"     |

|    |                                               |
|----|-----------------------------------------------|
| 22 | "Actigraphy"[TITLE-ABS-KEY]                   |
| 23 | "Accelerometry"[TITLE-ABS-KEY]                |
| 24 | pedometer*[TITLE-ABS-KEY]                     |
| 25 | ActivPAL [TITLE-ABS-KEY]                      |
| 26 | 24 hours [TITLE-ABS-KEY]                      |
| 27 | 24 hour [TITLE-ABS-KEY]                       |
| 28 | 24-hour [TITLE-ABS-KEY]                       |
| 29 | 24-hours[TITLE-ABS-KEY]                       |
| 30 | "Diurnal patterns" [TITLE-ABS-KEY]            |
| 31 | "Diurnal pattern" [TITLE-ABS-KEY]             |
| 32 | "Diurnal"[TITLE-ABS-KEY]                      |
| 33 | "Daily patterns"[TITLE-ABS-KEY]               |
| 34 | "Daily pattern"[TITLE-ABS-KEY]                |
| 35 | Chronotype [TITLE-ABS-KEY]                    |
| 36 | Morningness [TITLE-ABS-KEY]                   |
| 37 | Eveningness [TITLE-ABS-KEY]                   |
| 38 | "Circadian Clocks" [TITLE-ABS-KEY]            |
| 39 | "Circadian Rhythm" [TITLE-ABS-KEY]            |
| 40 | Hourly pattern [TITLE-ABS-KEY]                |
| 41 | Hourly patterns [TITLE-ABS-KEY]               |
| 42 | Set 22-41 were combined with "OR"             |
| 43 | Set 21-42 were combined with "AND"            |
| 44 | "Patient health questionnaire"[TITLE-ABS-KEY] |
| 45 | "Depressive disorder"[TITLE-ABS-KEY]          |
| 46 | "Depression"[TITLE-ABS-KEY]                   |
| 47 | "Depressive"[TITLE-ABS-KEY]                   |
| 48 | "PHQ"[TITLE-ABS-KEY]                          |
| 49 |                                               |
| 50 | Set 44-49 were combined with "OR"             |
| 51 | Set 43-50 were combined with "AND"            |
| 52 | "Review"[Doctype]                             |
| 53 | "Book chapter"[Doctype]                       |
| 54 | "Conference paper"[Doctype]                   |
| 55 | "Letter"[Doctype]                             |
| 56 | "Note"[Doctype]                               |
| 57 | "Short Survey"[Doctype]                       |
| 58 | "Conference Review"[Doctype]                  |
| 59 | "Editorial"[Doctype]                          |
| 60 | Set 52-59 were combined with "OR"             |
| 61 | Set 21-51 were combined with "AND"            |
| 62 | Sets 60 and 61 were combined with "NOT"       |
| 63 | Set 62 was limited to English language        |

**Supplementary Table S2.** Detailed description of inclusion/exclusion criteria according to a Population, Exposure, Outcomes and Study design (PEOS).

| INCLUSION CRITERIA |                                                                                                                                                                                                     |
|--------------------|-----------------------------------------------------------------------------------------------------------------------------------------------------------------------------------------------------|
| P = population     | Adults ( $\geq 18$ years old) with a clinical diagnosis of depression but no other medical conditions                                                                                               |
| E = exposure       | Physical activity measured objectively by accelerometers, pedometers, or other means, reporting the hourly amount of physical activity performed during the day (24-hour physical activity pattern) |
| O = outcome        | Incidence or prevalence of depression                                                                                                                                                               |
| S = study design   | Original epidemiological studies (case-control, cross-sectional or cohort studies)                                                                                                                  |
| EXCLUSION CRITERIA |                                                                                                                                                                                                     |
| P = population     | Subjects under the age of 18, subjects with a clinical diagnosis of depression and additional medical conditions                                                                                    |
| E = exposure       | Physical activity not measured objectively or reported as total amount per day instead of hour by hour during the day                                                                               |
| O = outcome        | Other psychological disorders                                                                                                                                                                       |
| S = study design   | Review article, systematic review, meta-analysis, trial, expert opinion, commentary, article with no quantitative information or details                                                            |

**Supplementary Table S3.** Articles assessed in full and excluded with reasons

| <b>Reason of exclusion</b>         | <b>n. of studies</b> | <b>Author, year [Ref]</b>                                                                                                                                                                                                                                                                                                                              |
|------------------------------------|----------------------|--------------------------------------------------------------------------------------------------------------------------------------------------------------------------------------------------------------------------------------------------------------------------------------------------------------------------------------------------------|
| Data reported in aggregated way    | 13                   | Asai et al., 2018; Del Pozo Cruz et al., 2020; Difrancesco et al., 2019; Dillon et al., 2018; Figueroa et al., 2021; Gonzalez et al., 2014; Helgadottir et al., 2015; Krane-Gartiser, Henriksen et al. 2014, Krane-Gartiser, Henriksen et al. 2015, Kuhs and Reschke, 1992; Mendlowicz et al., 1999; Todder et al., 2009; Volkers et al., 2003 [35-47] |
| Different control group            | 3                    | Foster et al. 1975, Benoit et al. 1985, Krane-Gartiser et al. 2017 [48-50]                                                                                                                                                                                                                                                                             |
| Different outcome                  | 2                    | Korszun et al. 2002, Hori et al. 2016 [51, 52]                                                                                                                                                                                                                                                                                                         |
| Subjects with other comorbidities  | 6                    | Appelhans et al., 2012; Krane-Gartiser et al., 2016; Parker et al., 2002; Porta et al., 2018; Verkooijen et al., 2017; McGowan et al., 2019 [53-57]                                                                                                                                                                                                    |
| Subjects younger than 18 years old | 2                    | Finazzi et al., 2010; Merikanto et al., 2017[58-59]                                                                                                                                                                                                                                                                                                    |

**Supplementary Table S4.** The Newcastle-Ottawa Scale (NOS) quality assessment of the included studies, in alphabetical order.

| Author, year<br>[Ref]            | Study<br>type | Selection |        |        |        | Comparability |         | Outcome/Exposure <sup>^</sup> |        |        | Total |
|----------------------------------|---------------|-----------|--------|--------|--------|---------------|---------|-------------------------------|--------|--------|-------|
|                                  |               | Item 1    | Item 2 | Item 3 | Item 4 | Item 5a       | Item 5b | Item 6                        | Item 7 | Item 8 |       |
| Banihashemi, N. et al, 2016 [61] | Case control  | *         | *      | -      | *      | *             | *       | *                             | *      | -      | 7     |
| Difrancesco, S. et al, 2021 [62] | Cohort study  | *         | *      | *      | -      | *             | *       | *                             | -      | *      | 7     |
| Lorenz, N. et al, 2019 [63]      | Case-control  | *         | *      | *      | *      | *             | *       | *                             | *      | -      | 8     |
| Minaeva, O. et al, 2020 [24]     | Case-control  | *         | *      | *      | *      | *             | *       | *                             | *      | *      | 8     |
| Wolff, E. et al, 1985 [64]       | Case control  | *         | *      | -      | *      | *             | *       | *                             | *      | *      | 7     |

<sup>^</sup>based on study design. Outcome was considered in cross-sectional and cohort studies, exposure was considered in case-control studies.

\* Each star represents a high-quality criterion accomplished by the study

- represents that the study did not satisfy the criterion
